# Supplementary material for: Structural diversity of Burkholderia pseudomallei lipopolysaccharides affects innate immune signaling
Source: PubMed Central journal article supplement (PMC5425228; doi:10.1371/journal.pntd.0005571), 2017-04-28
Supplement: pntd.0005571.s002.pdf [file pntd.0005571.s002.pdf]

| Genes upregulated in response to LPS treatment |                 |          |                 |           |
|------------------------------------------------|-----------------|----------|-----------------|-----------|
| Gene                                           | Type A treated  |          | Type B treated  |           |
|                                                | Fold Regulation | p-value  | Fold Regulation | p-value   |
| C3                                             | 1.94            | -        | 2.78            | 0.0001    |
| C5ar1                                          | 1.78            | -        | 2.97            | 0.00008   |
| Ccl12                                          | 2.71            | -        | 10.81           | 0.00174   |
| Ccl5                                           | 1.24            | -        | 7.47            | 0.000056  |
| Cd14                                           | 1.11            | -        | 2.02            | 0.000012  |
| Cd40                                           | 2.38            | 0.000057 | 18.03           | 0.000024  |
| Cd80                                           | 1.46            | -        | 3.67            | 0.000133  |
| Csf2                                           | 1.51            | -        | 4.37            | 0.015724  |
| Cxcl10                                         | 3.78            | 0.000068 | 26.12           | 0.000003  |
| Ddx58                                          | 1.6             | -        | 2.57            | 0.000032  |
| Foxp3                                          | 2.1             | 0.002029 | 1.45            | -         |
| Icam1                                          | 2.19            | 0.000003 | 7.26            | 0.000001  |
| Ifnb1                                          | 2.44            | 0.029364 | 42.89           | 0.000001  |
| Il10                                           | 2.06            | 0.023755 | 3.79            | 0.00023   |
| Il1a                                           | 4.59            | 0.002784 | 429.94          | 0         |
| Il1b                                           | 13.67           | 0.000011 | 1489.51         | 0.000001  |
| Il23a                                          | 1.3             | -        | 6.18            | 0.000926  |
| Il6                                            | -1.35           | -        | 19.4            | 0.000565  |
| Irf7                                           | 1.35            | -        | 2.15            | 0.000057  |
| Jak2                                           | 1.23            | -        | 4.11            | 0.000308  |
| Mx1                                            | 2.53            | 0.001237 | 8.47            | 0.002399  |
| Myd88                                          | 1.61            | -        | 2.45            | 0.001482  |
| Nfkb1                                          | 1.58            | -        | 4.47            | 0.000039  |
| Nfkbia                                         | 1.76            | -        | 10.14           | 0.000092  |
| Nlrp3                                          | 2.88            | 0.000002 | 17.52           | 0.000112  |
| Nod2                                           | 2.66            | 0.00101  | 13.2            | 0.000221  |
| Ticam1                                         | 1.89            | -        | 3.93            | 0.0000407 |
| Tlr1                                           | 1.23            | -        | 2.7             | 0.000009  |
| Tlr2                                           | 2               | -        | 4.25            | 0.000004  |
| Tlr6                                           | 1.47            | -        | 2.3             | 0.001377  |
| Tlr9                                           | 3.1             | 0.008472 | 4.53            | 0.001684  |
| Tnf                                            | 4.77            | 0.000023 | 50.56           | 0         |

**S1 Table. Macrophage genes upregulated in response to LPS treatment.**
