# Supplementary material for: Structural diversity of Burkholderia pseudomallei lipopolysaccharides affects innate immune signaling
Source: PubMed Central journal article supplement (PMC5425228; doi:10.1371/journal.pntd.0005571), 2017-04-28
Supplement: pntd.0005571.s003.pdf [file pntd.0005571.s003.pdf]

| LPS sample        | MyD88 dependent pathway induction | MyD88 independent pathway induction |
|-------------------|-----------------------------------|-------------------------------------|
| Type A            | NS                                | NS                                  |
| Type B            | ***                               | ***                                 |
| Type B2           | **                                | NS                                  |
| Rough             | ***                               | ***                                 |
| <i>Salmonella</i> | ***                               | ***                                 |

NS, not significant; \*\*,  $p < 0.005$ ; \*\*\*,  $p < 0.0005$

**S2 Table. Innate immune pathway induction by the different LPS types.**
