# Supplementary material for: Structural diversity of Burkholderia pseudomallei lipopolysaccharides affects innate immune signaling
Source: PubMed Central journal article supplement (PMC5425228; doi:10.1371/journal.pntd.0005571), 2017-04-28
Supplement: pntd.0005571.s004.pdf [file pntd.0005571.s004.pdf]

# MSHR435 type R LPS

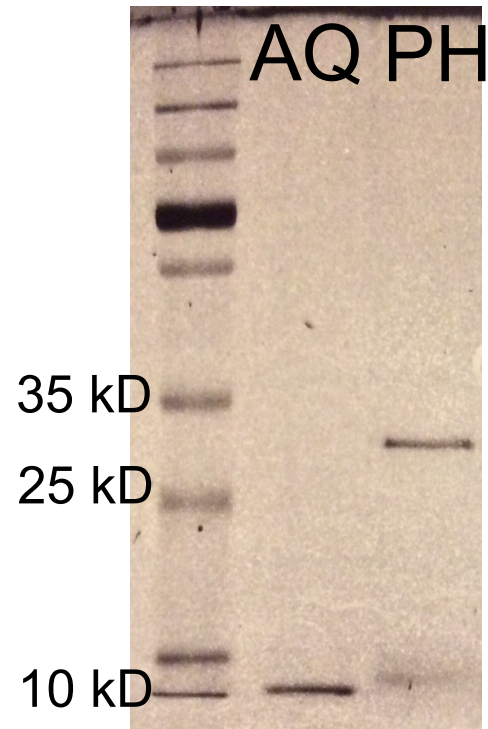

S1 Fig. Silver stain gel of rough LPS isolated from *Bp\_MSHR435*
