# Supplementary material for: Structural diversity of Burkholderia pseudomallei lipopolysaccharides affects innate immune signaling
Source: PubMed Central journal article supplement (PMC5425228; doi:10.1371/journal.pntd.0005571), 2017-04-28
Supplement: pntd.0005571.s005.pdf [file pntd.0005571.s005.pdf]

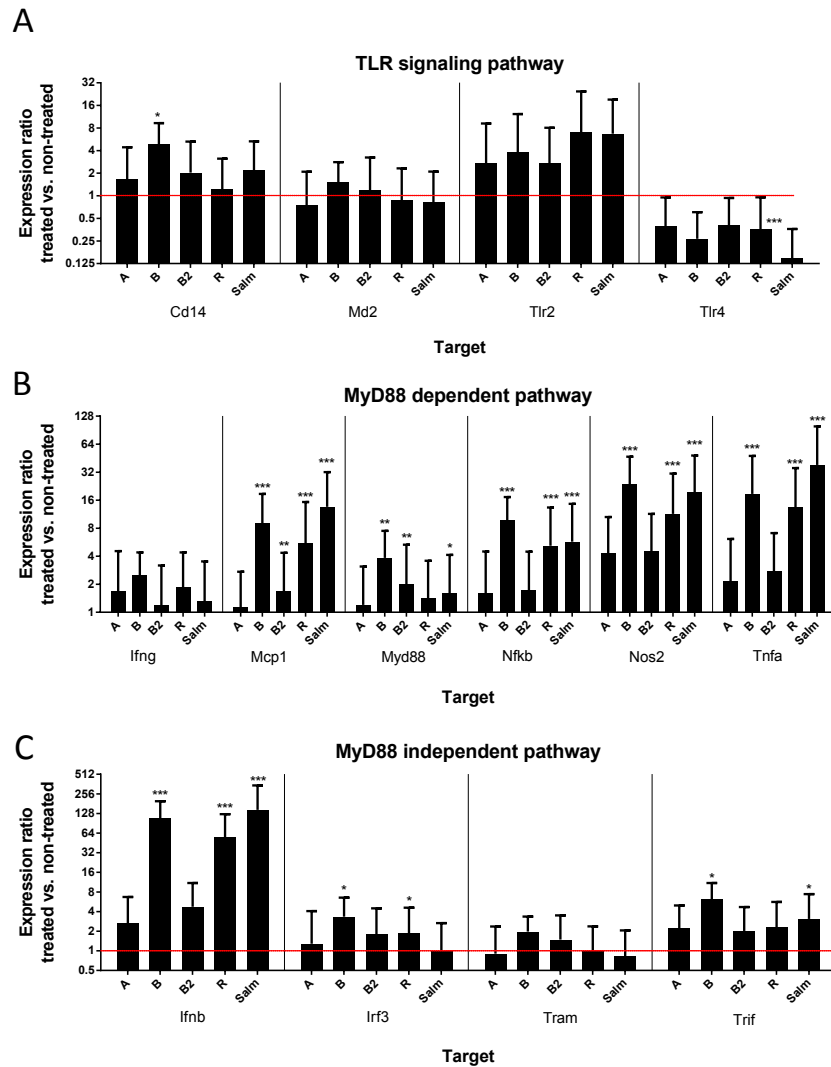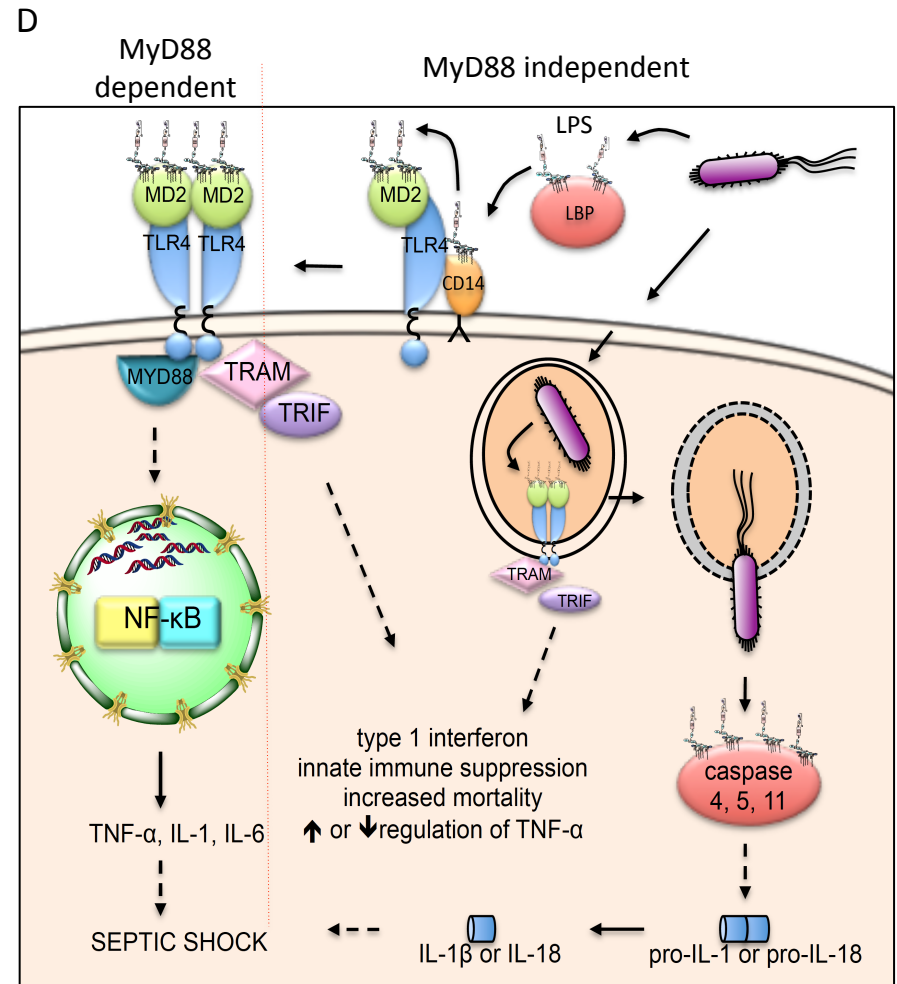

**S2 Fig. qPCR analysis of LPS innate immune signaling in RAW264.7 macrophages.**
