# Supplementary material for: Structural diversity of Burkholderia pseudomallei lipopolysaccharides affects innate immune signaling
Source: PubMed Central journal article supplement (PMC5425228; doi:10.1371/journal.pntd.0005571), 2017-04-28

# PCA analysis of hPBMC treated with LPS

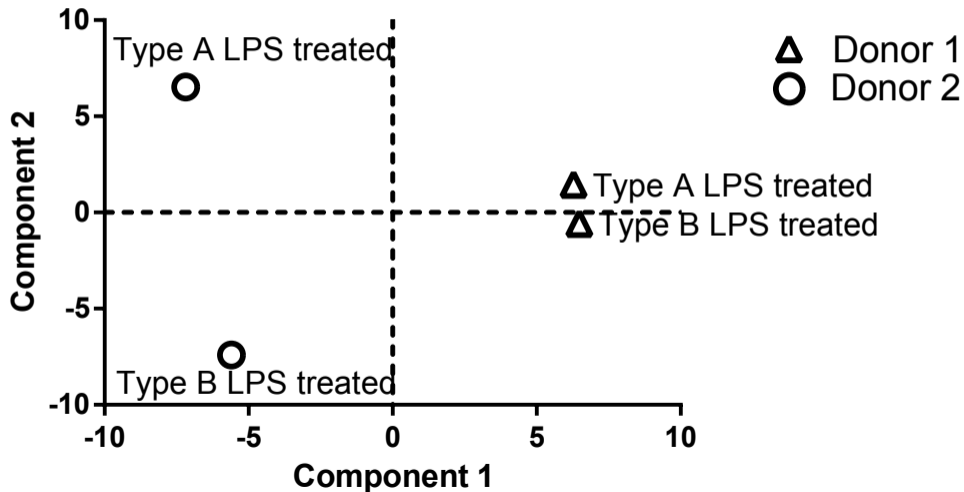

Supplement: pntd.0005571.s006.pdf [file pntd.0005571.s006.pdf]
